# Supplementary material
Source: publisher site journal article supplement (https://www.spandidos-publications.com/6156/downloadSupplementary)
Supplement: Supplementary file 1 [file downloadSupplementary]

## Sheet: Primer
Table SI. Primer sequences used for RT-qPCR.
Primer name	Forward sequence (5’ - 3’)	Reverse sequence (5’ - 3’)
q-FSCN1	CCAGGGTATGGACCTGTCTG	GTGTGGGTACGGAAGGCAC
q-IFIT2	AAGCACCTCAAAGGGCAAAAC	TCGGCCCATGTGATAGTAGAC
q-IFIT3	AAAAGCCCAACAACCCAGAAT	CGTATTGGTTATCAGGACTCAGC
q-OASL	CCATTGTGCCTGCCTACAGAG	CTTCAGCTTAGTTGGCCGATG
q-SQLE	GGCATTGCCACTTTCACCTAT	GGCCTGAGAGAATATCCGAGAAG
q-FDFT1	CCACCCCGAAGAGTTCTACAA	TGCGACTGGTCTGATTGAGATA
q-DHCR24	GCCGCTCTCGCTTATCTTCG	GTCTTGCTACCCTGCTCCTT
q-SLC38A2	ACCGCAGCCGTAGAAGAATG	GCCAGACGGACAATGAGAAGAA
q-PTGR1	AGCACTTTGTTGGCTATCCTAC	CCCCATCATTGTATCACCTTCC
